# Supplementary material for: An unexplored role of the CrOx shell in an elaborated Rh/CrOx core–shell cocatalyst for photocatalytic water splitting: a selective electron transport pathway from semiconductors to core metals, boosting charge separation and H2 evolution
Source: Royal Society of Chemistry journal article supplement (doi:10.1039/d2ey00109h), 2023-01-01
Supplement: d2ey00109h1.pdf [file d2ey00109h1.pdf]

## ***Supplementary Information***

**An unexplored role of the CrO<sub>x</sub> shell in an elaborated Rh/CrO<sub>x</sub> core–shell cocatalyst for photocatalytic water splitting: a selective electron transport pathway from semiconductors to core metals, boosting charge separation and H<sub>2</sub> evolution**

*Tetsu Kotani,<sup>‡a</sup> Kanta Ogawa,<sup>‡a†</sup> Hajime Suzuki,<sup>a</sup> Kosaku Kato,<sup>b</sup> Osamu Tomita,<sup>a</sup> Akira Yamakata,<sup>b</sup> Ryu Abe<sup>\*a</sup>*

<sup>a</sup> Department of Energy and Hydrocarbon Chemistry, Graduate School of Engineering, Kyoto University, Nishikyo-ku, Kyoto 615-8510, Japan

<sup>b</sup> Graduate School of Natural Science and Technology, Okayama University, 3-1-1 Tsushima-naka, Kita-ku, Okayama 700-8530, Japan

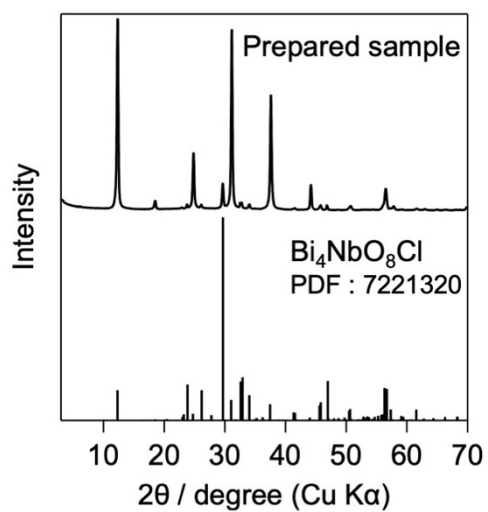

**Figure S1.** XRD pattern of  $\text{Bi}_4\text{NbO}_8\text{Cl}$  prepared via the flux method.

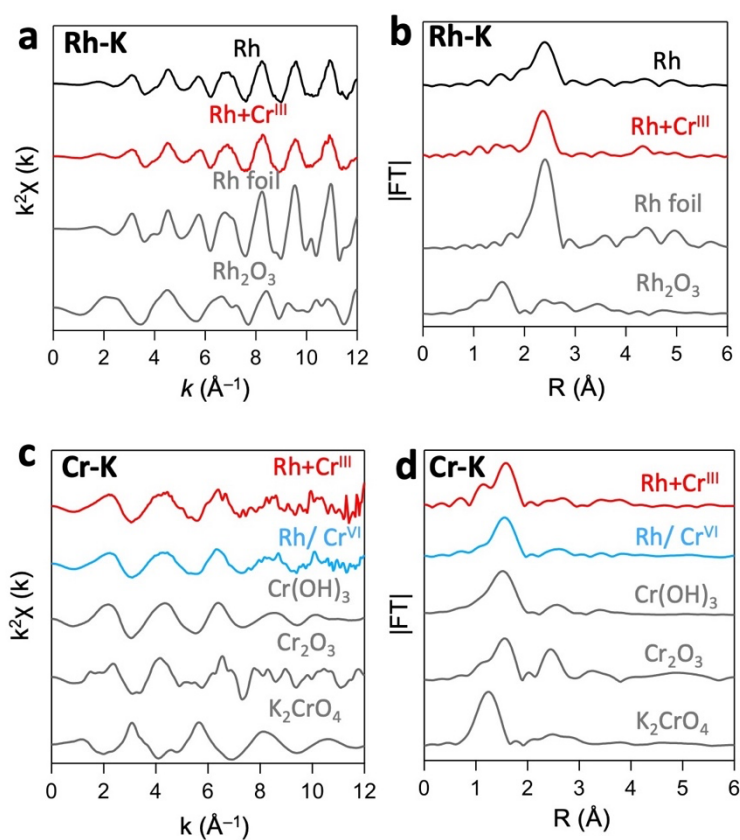

**Figure S2.** Rh K-edge (a)  $k^2$ -weighted EXAFS and (b) Fourier transform of Rh,  $\text{Rh}+\text{Cr}^{\text{III}}$  samples along with Rh foil and  $\text{Rh}_2\text{O}_3$  as references. Cr K-edge (c)  $k^2$ -weighted EXAFS and (d) Fourier transform of  $\text{Rh}+\text{Cr}^{\text{III}}$ ,  $\text{Rh}/\text{Cr}^{\text{VI}}$  samples along with  $\text{Cr}(\text{OH})_3$ ,  $\text{Cr}_2\text{O}_3$ ,  $\text{K}_2\text{CrO}_4$  as references.

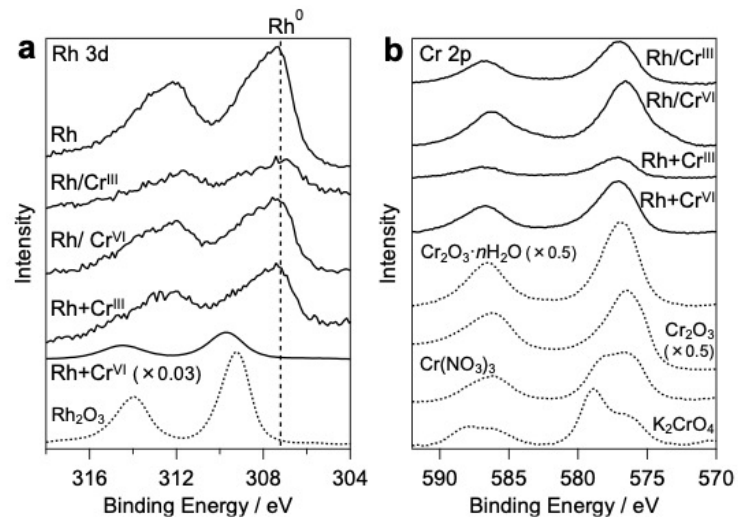

**Figure S3.** Rh 3d and Cr 2p XPS results of Rh and Cr - loaded Bi<sub>4</sub>NbO<sub>8</sub>Cl prepared via stepwise (Rh/Cr<sup>III</sup>, Rh/Cr<sup>VI</sup>) and simultaneous deposition (Rh+Cr<sup>III</sup>, Rh+Cr<sup>VI</sup>). The Rh 3d spectrum of Rh<sub>2</sub>O<sub>3</sub> and the Cr 2p spectra of Cr<sub>2</sub>O<sub>3</sub>, Cr(NO<sub>3</sub>)<sub>3</sub>, and K<sub>2</sub>CrO<sub>4</sub> are shown as references.

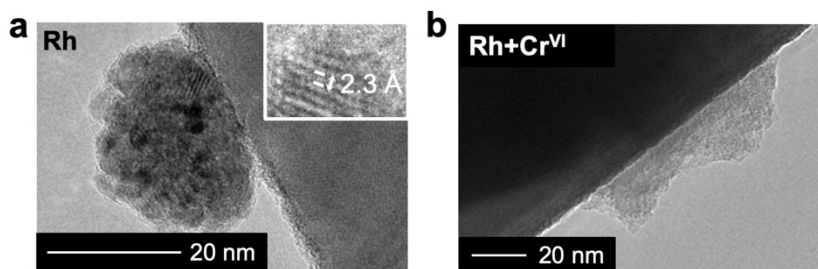

**Figure S4.** HR-TEM images of (a) Rh, (b) Rh+Cr<sup>VI</sup> loaded on Bi<sub>4</sub>NbO<sub>8</sub>Cl.

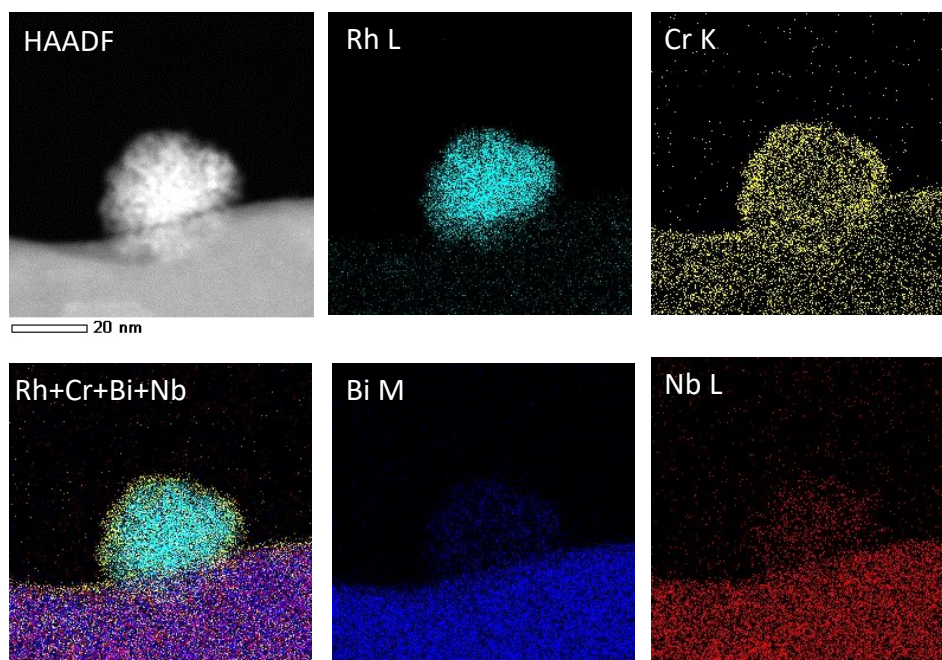

**Figure S5.** HAADF-STEM and EDX elemental mapping images of Rh/Cr<sup>III</sup> sample.

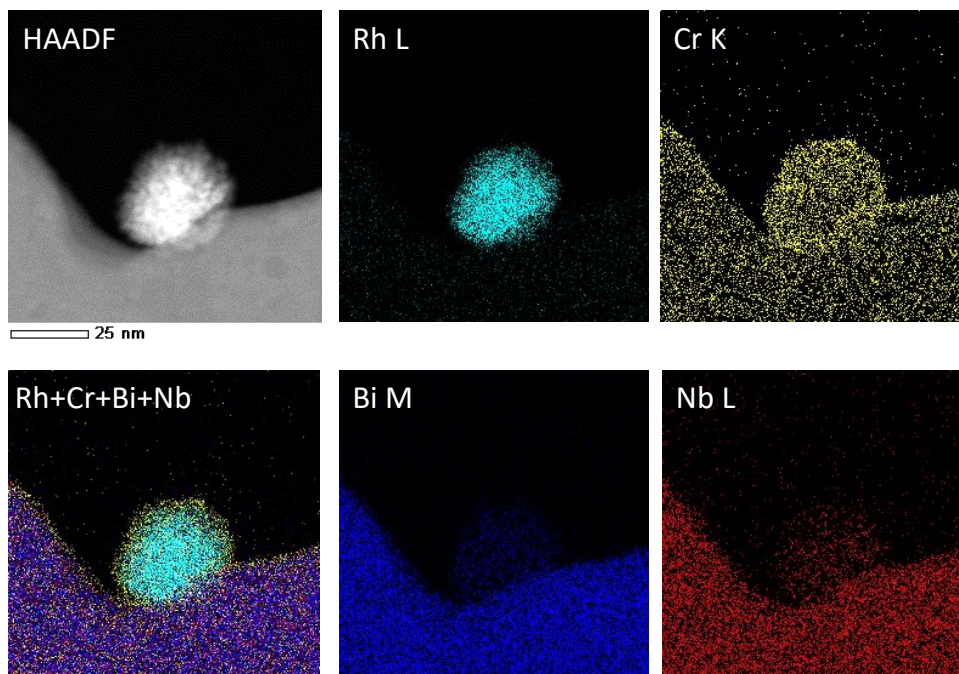

**Figure S6.** HAADF-STEM and EDX elemental mapping images of Rh/Cr<sup>VI</sup> sample.

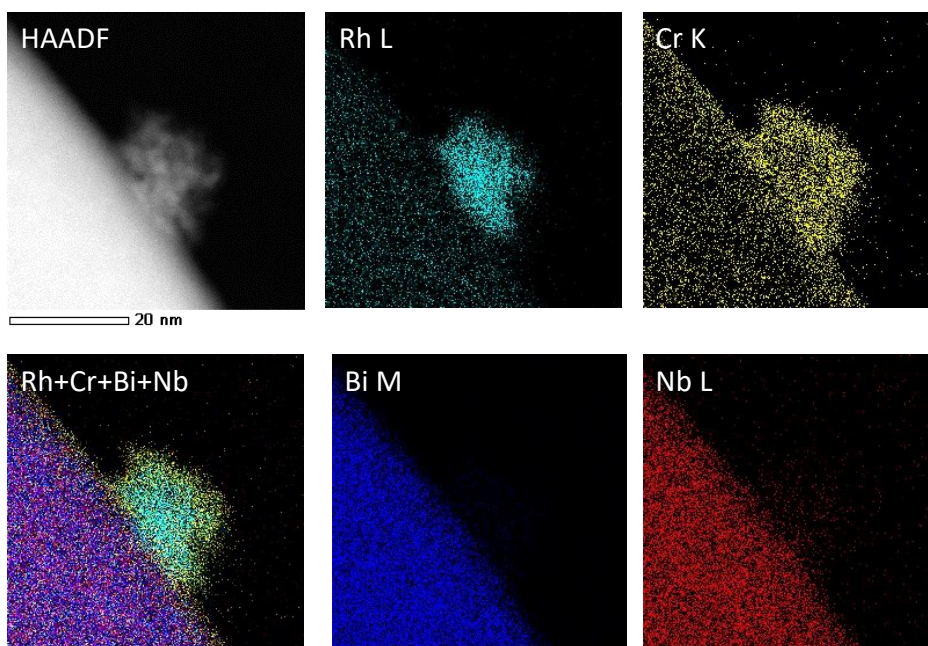

**Figure S7.** HAADF-STEM and EDX elemental mapping images of Rh+Cr<sup>III</sup> sample.

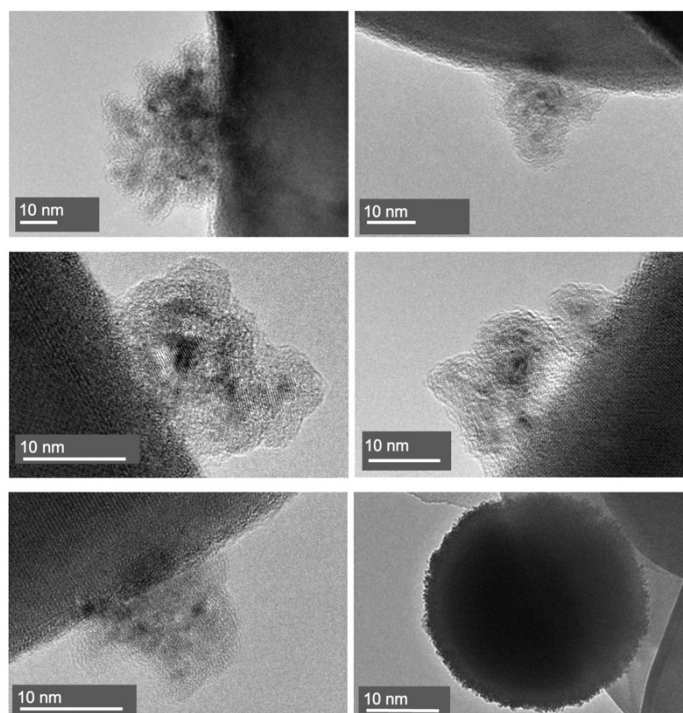

**Figure S8.** TEM images of Rh+Cr<sup>III</sup> loaded Bi<sub>4</sub>NbO<sub>8</sub>Cl.

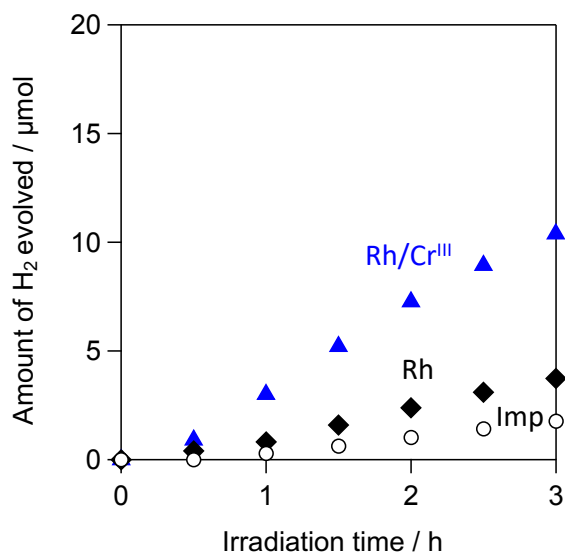

**Figure S9.** Time courses of H<sub>2</sub> evolution of Rh (black), Rh/Cr<sup>III</sup> (blue), and Imp samples in an aqueous methanol solution (20 vol%, 250 mL) under visible light irradiation ( $\lambda > 400$  nm). For Imp sample, CrO<sub>x</sub> was deposited on the photocatalyst by the impregnation method using Cr(NO<sub>3</sub>)<sub>3</sub> as a precursor under an Ar flow at 150 °C.

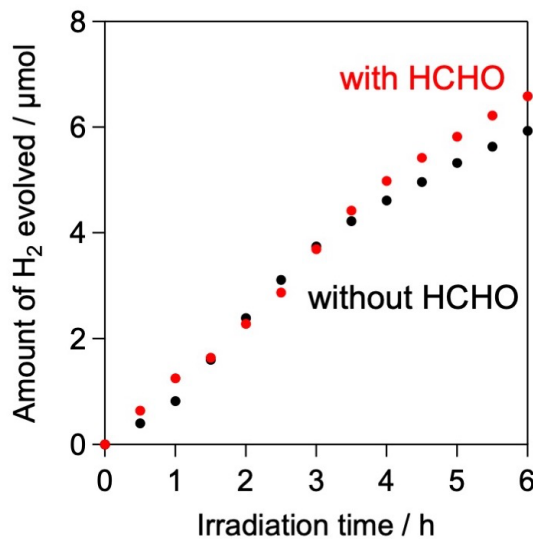

**Figure S10.** Time courses of H<sub>2</sub> evolution of Rh loaded samples in an aqueous methanol solution (20 vol%, 250 mL) with or without formaldehyde (HCHO).

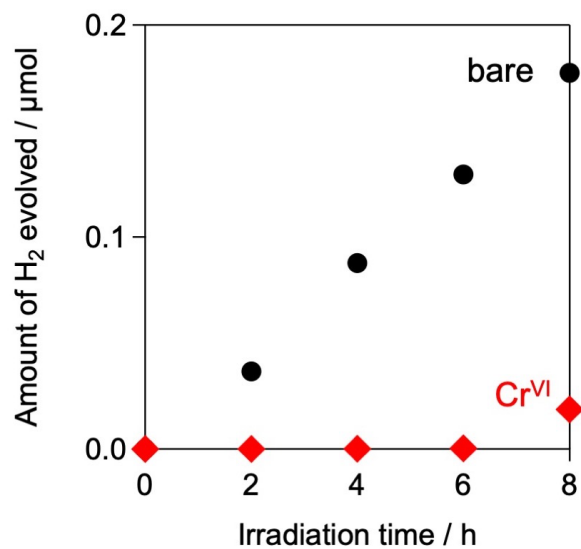

**Figure S11.** Time courses of H<sub>2</sub> evolution of bare or CrO<sub>x</sub>-loaded Bi<sub>4</sub>NbO<sub>8</sub>Cl in an aqueous methanol

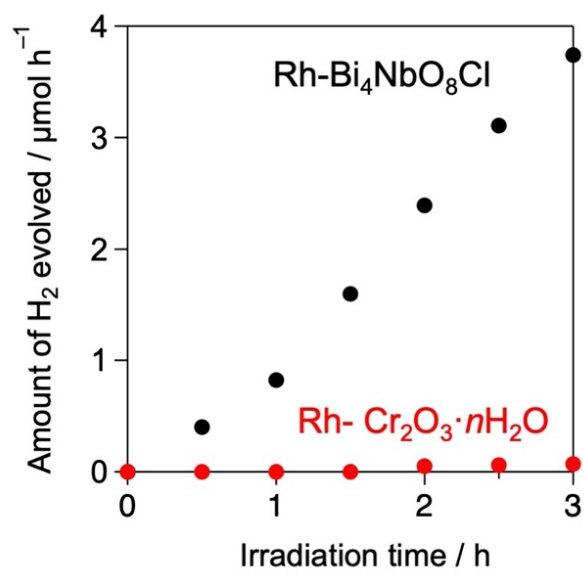

**Figure S12.** Time courses of H<sub>2</sub> evolution of Rh loaded Bi<sub>4</sub>NbO<sub>8</sub>Cl and Cr<sub>2</sub>O<sub>3</sub>·nH<sub>2</sub>O samples in an aqueous methanol solution (20 vol%, 250 mL) under visible light ( $\lambda > 400$  nm).

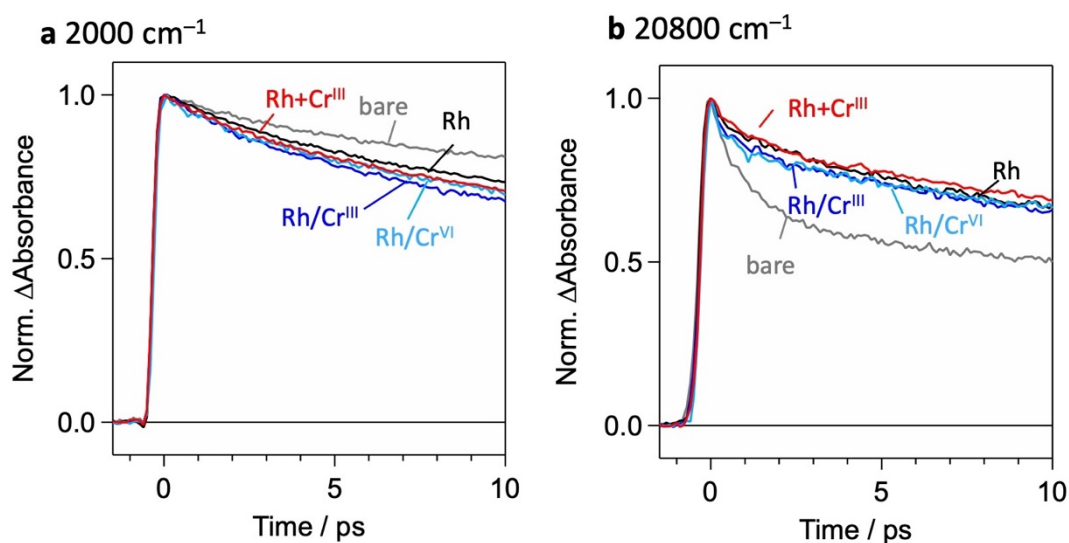

**Figure S13.** Femtosecond decay profiles of transient absorptions at (a)  $2,000\text{ cm}^{-1}$  (b) and  $20,800\text{ cm}^{-1}$ . The samples were excited by  $355\text{ nm}$  laser pulses ( $90\text{ fs}$  duration,  $6\text{ }\mu\text{J}$ ,  $500\text{ Hz}$ ) in  $\text{N}_2$  ( $20\text{ Torr}$ ) for the several pico-second (ps) region.

**Table S1.** Fitting parameters for TA decays at  $2,000\text{ cm}^{-1}$ . TA decays were fitted with single exponential function.

|                      | $A$              | $\tau/\text{ps}$ |
|----------------------|------------------|------------------|
| bare                 | $0.975 \pm 0.02$ | $50.5 \pm 0.8$   |
| Rh                   | $0.973 \pm 0.02$ | $33.6 \pm 0.5$   |
| Rh/Cr <sup>VI</sup>  | $0.963 \pm 0.03$ | $31.1 \pm 0.4$   |
| Rh/Cr <sup>III</sup> | $0.961 \pm 0.03$ | $27.1 \pm 0.4$   |
| Rh+Cr <sup>III</sup> | $0.955 \pm 0.03$ | $30.9 \pm 0.5$   |

**Table S2.** Fitting parameters for TA decays at  $20,800\text{ cm}^{-1}$ . TA decays were fitted with single exponential function.

|                      | $A$               | $\tau/\text{ps}$ |
|----------------------|-------------------|------------------|
| bare                 | $0.77 \pm 0.01$   | $20 \pm 1$       |
| Rh                   | $0.901 \pm 0.004$ | $30.0 \pm 0.6$   |
| Rh/Cr <sup>VI</sup>  | $0.866 \pm 0.004$ | $36 \pm 2$       |
| Rh/Cr <sup>III</sup> | $0.882 \pm 0.004$ | $31.1 \pm 0.9$   |
| Rh+Cr <sup>III</sup> | $0.911 \pm 0.004$ | $33.9 \pm 0.5$   |



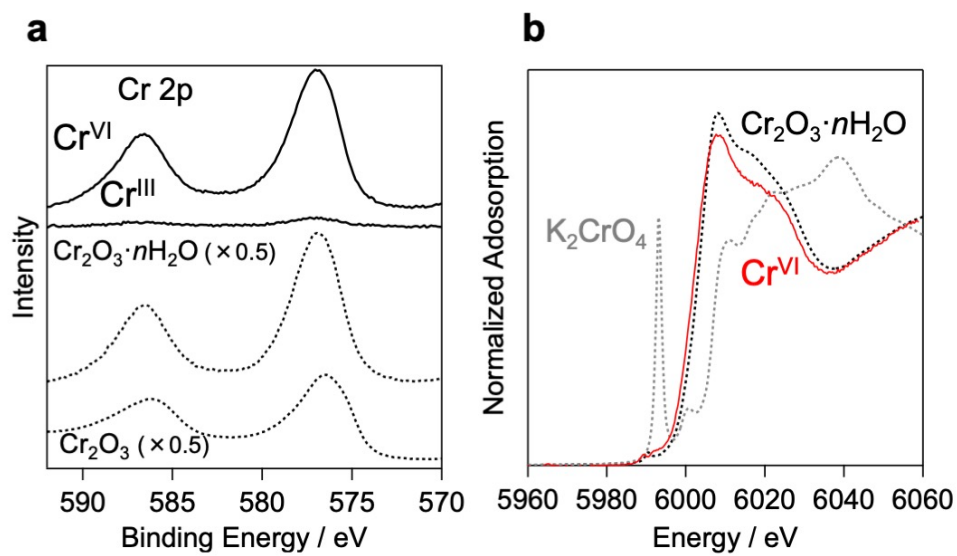

**Figure S14** (a) Cr 2p X-ray photoelectron and Cr-K edge XANES spectra of the sample after photoirradiation in a methanol solution containing K<sub>2</sub>CrO<sub>4</sub> or Cr(NO<sub>3</sub>)<sub>3</sub> solution under visible light ( $\lambda > 400$  nm).

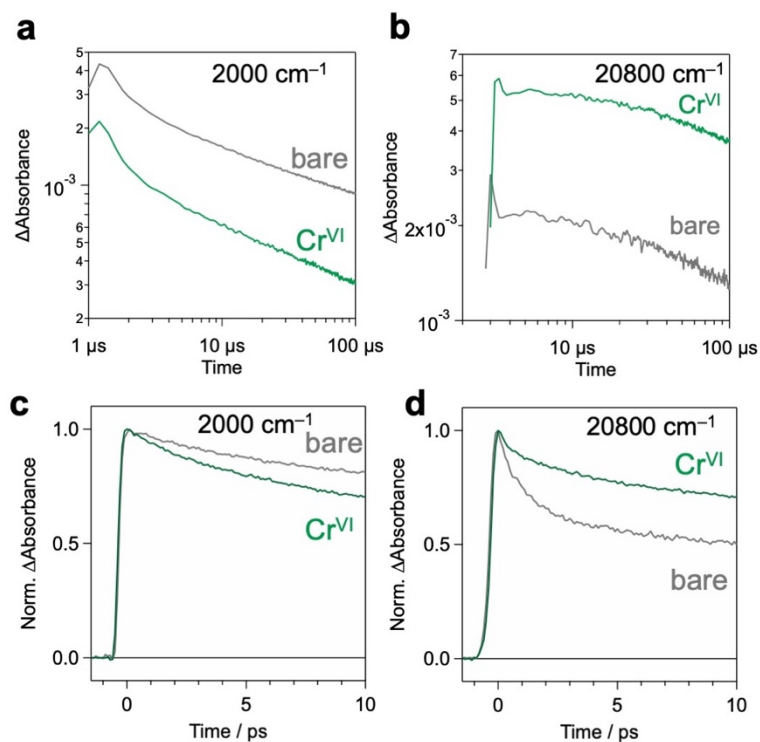

**Figure S15.** Decay kinetics of TA in the (a, b) microsecond and (c, d) picosecond regions measured at (a, c) 2000 cm<sup>-1</sup> and (b, d) 20800 cm<sup>-1</sup> in N<sub>2</sub> (20 Torr). The samples were excited by UV laser pulses (355 nm, 0.5 mJ cm<sup>-2</sup>). The CrO<sub>x</sub>-loaded Bi<sub>4</sub>NbO<sub>8</sub>Cl sample was prepared via photodeposition of K<sub>2</sub>Cr<sup>VI</sup>O<sub>4</sub>, providing almost same valence state of Cr as those in Rh/Cr<sup>III</sup>, Rh/Cr<sup>VI</sup>, and Rh+Cr<sup>III</sup> (i.e., Cr<sub>2</sub>O<sub>3</sub>•nH<sub>2</sub>O, see Figure S14). The CrO<sub>x</sub> loading on Bi<sub>4</sub>NbO<sub>8</sub>Cl surface significantly decreases the IR signal but increases the visible signal in the microsecond region, while the initial decay process could not be observed due to the limit of the time resolution. The carrier transfer from semiconductors to cocatalysts generally takes place on the pico-to-nanosecond time scale.<sup>8,26,31</sup> Indeed, the TA measurements in picosecond region (c, d) clearly show the initial process, in which the CrO<sub>x</sub> loading accelerated the decay of the electron (IR) but decelerated that of holes (visible).

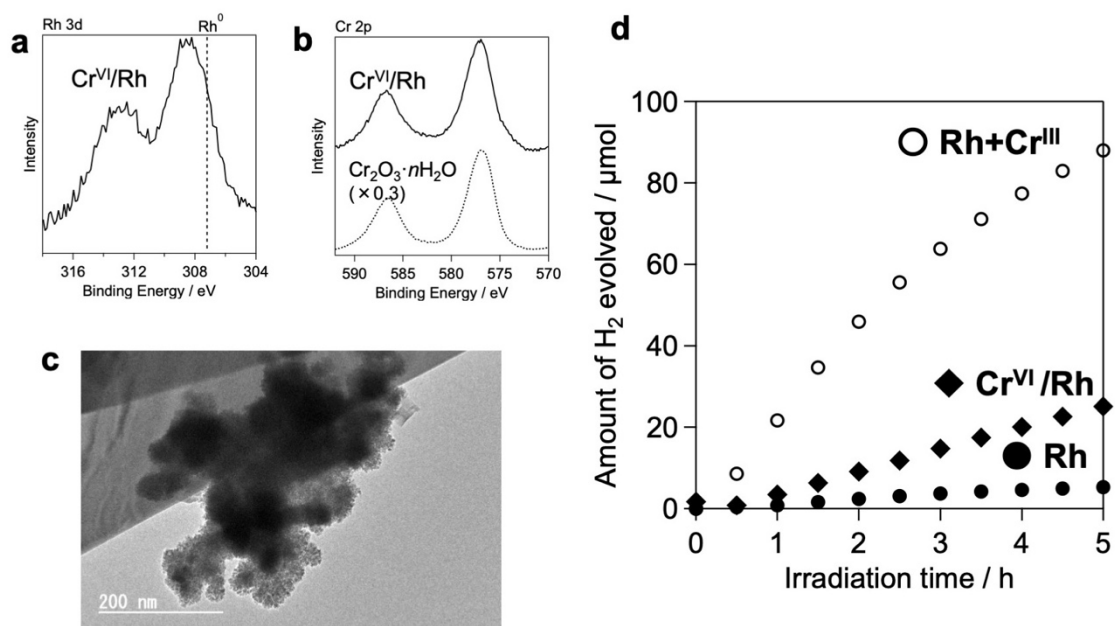

**Figure S16.** (a) Rh 3d and (b) Cr 2p X-ray photoelectron spectra, and (c) TEM images of a sample loaded with CrO<sub>x</sub> prior to Rh. The spectra of reference samples are shown as dotted lines. (d) Time courses of H<sub>2</sub> evolution of a sample loaded with CrO<sub>x</sub> prior to Rh (Cr<sup>VI</sup>/Rh). The CrO<sub>x</sub> was deposited on Bi<sub>4</sub>NbO<sub>8</sub>Cl via the photoreduction of Cr<sup>VI</sup> species.

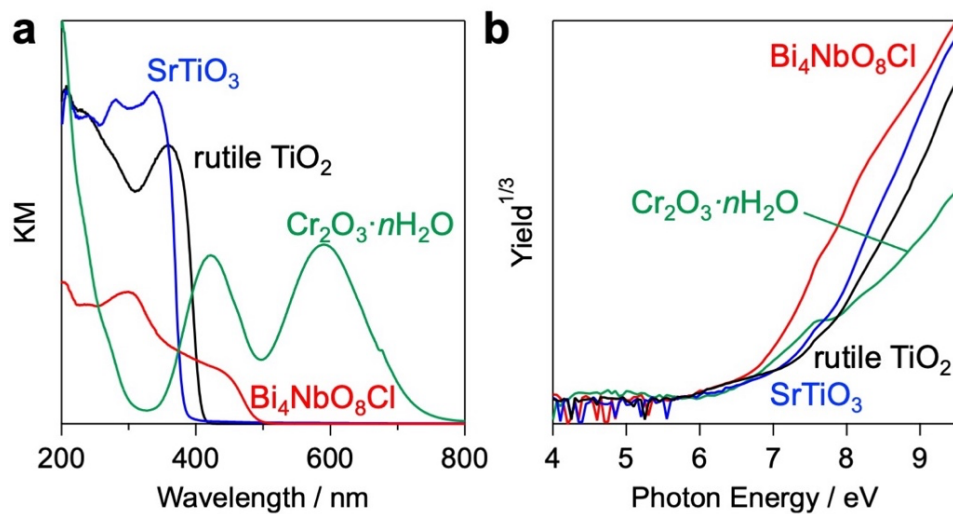

**Figure S17.** (a) Diffuse reflection spectra and (b) photoemission yield spectra of Bi<sub>4</sub>NbO<sub>8</sub>Cl, Cr<sub>2</sub>O<sub>3</sub>·nH<sub>2</sub>O, SrTiO<sub>3</sub>, and TiO<sub>2</sub>.

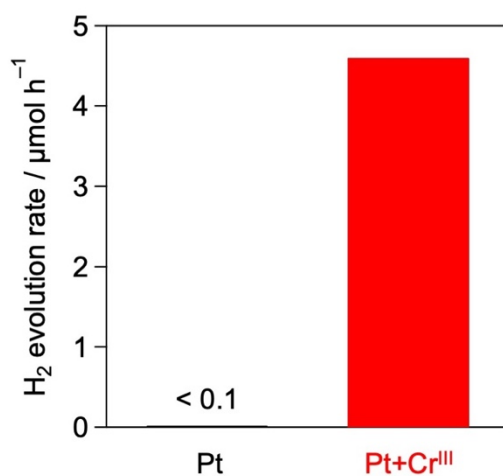

**Figure S18.** Rates of H<sub>2</sub> evolution over Pt and Pt+Cr<sup>III</sup> loaded Bi<sub>4</sub>NbO<sub>8</sub>Cl samples. The reactions were conducted in an aqueous methanol solution (20 vol%, 250 mL) under visible light irradiation ( $\lambda > 400$  nm).

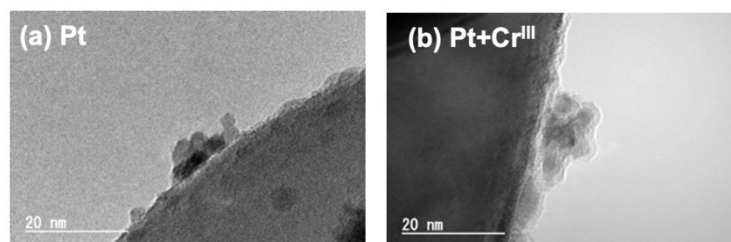

**Figure S19.** TEM images of (a) Pt, (b) Pt+Cr<sup>III</sup> loaded Bi<sub>4</sub>NbO<sub>8</sub>Cl.

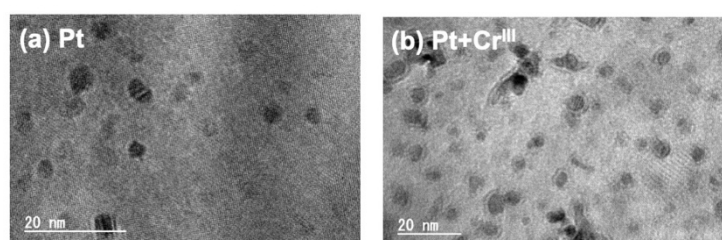

**Figure S20.** TEM images of (a) Pt, (b) Pt+Cr<sup>III</sup> loaded on the dominant facet ((001)) of Bi<sub>4</sub>NbO<sub>8</sub>Cl.

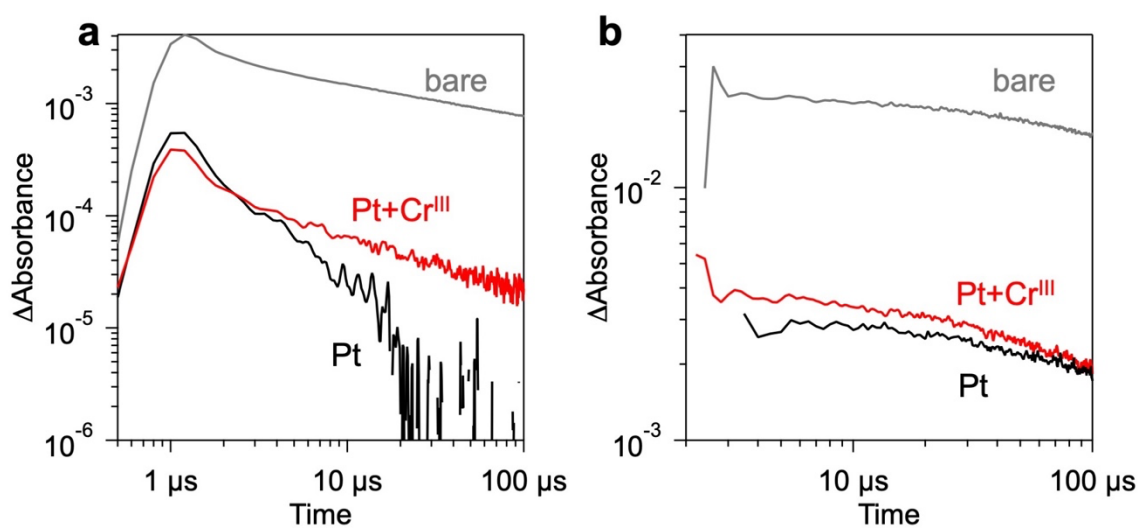

**Figure S21.** TA decay kinetics of bare (gray), Pt (black), and Pt+Cr<sup>III</sup> (red) samples in microsecond regions measured at (a) 2000 cm<sup>-1</sup> and (b) 20800 cm<sup>-1</sup> in N<sub>2</sub> (20 Torr). The samples were excited by UV laser pulses (355 nm).

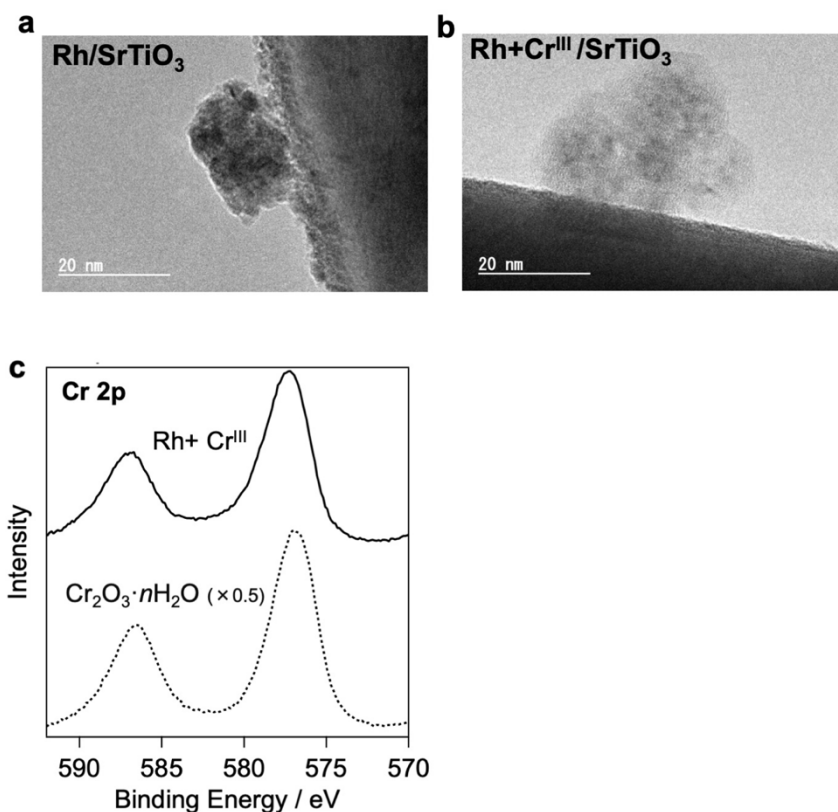

**Figure S22.** TEM images of (a) Rh, (b) Rh+Cr<sup>III</sup>/SrTiO<sub>3</sub>. c, XPS spectra for Rh+Cr<sup>III</sup>/SrTiO<sub>3</sub> focusing on the Cr 2p region.

**Table S3.** H<sub>2</sub> evolution rates of various semiconductor photocatalysts loaded with Rh or Rh+Cr<sup>III</sup>. In the case of Bi<sub>4</sub>NbO<sub>8</sub>Cl, Rh+Cr<sup>III</sup> shows a 30 times higher activity than Rh, while for SrTiO<sub>3</sub> the improvement rate is only double, which suggests that the effect of CrO<sub>x</sub> loading on the activity is smaller in SrTiO<sub>3</sub> than in Bi<sub>4</sub>NbO<sub>8</sub>Cl. Due to the smaller effect of CrO<sub>x</sub> on the activity of SrTiO<sub>3</sub>, other factors may contribute to the activity. For example, Rh in Rh+Cr<sup>III</sup> is not fully reduced (Figure S23), which may cause the lower activity of Rh+Cr<sup>III</sup> than Rh/Cr<sup>VI</sup> in the case of SrTiO<sub>3</sub>.

|                                     |                    | Rh    | Rh/Cr <sup>VI</sup> | Rh+Cr <sup>III</sup> |
|-------------------------------------|--------------------|-------|---------------------|----------------------|
| Bi <sub>4</sub> NbO <sub>8</sub> Cl | $\lambda > 400$ nm | 0.82  | 3.18                | 24.28                |
| SrTiO <sub>3</sub>                  | $\lambda > 300$ nm | 25.0  | 69.5                | 53.2                 |
| rutile TiO <sub>2</sub>             | $\lambda > 300$ nm | 156.7 | 1.48                | 27.7                 |

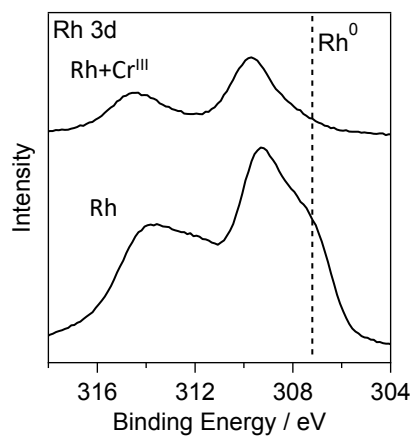

**Figure S23.** Rh 3d X-ray photoelectron spectra of Rh and Rh+Cr<sup>III</sup> loaded SrTiO<sub>3</sub>.

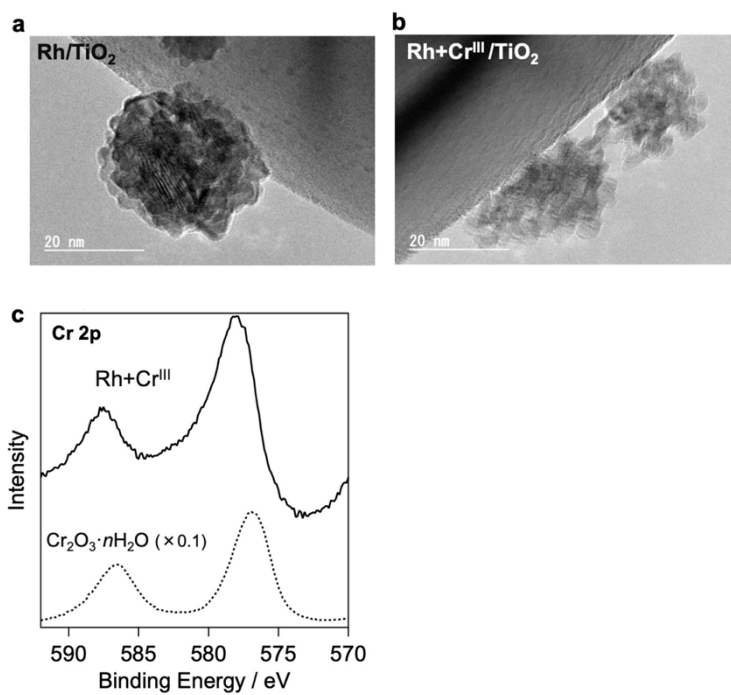

**Figure S24.** TEM images of (a) Rh, (b) Rh+Cr<sup>III</sup>/TiO<sub>2</sub>. c, XPS spectra for Rh+Cr<sup>III</sup>/TiO<sub>2</sub> focusing on the Cr 2p region.

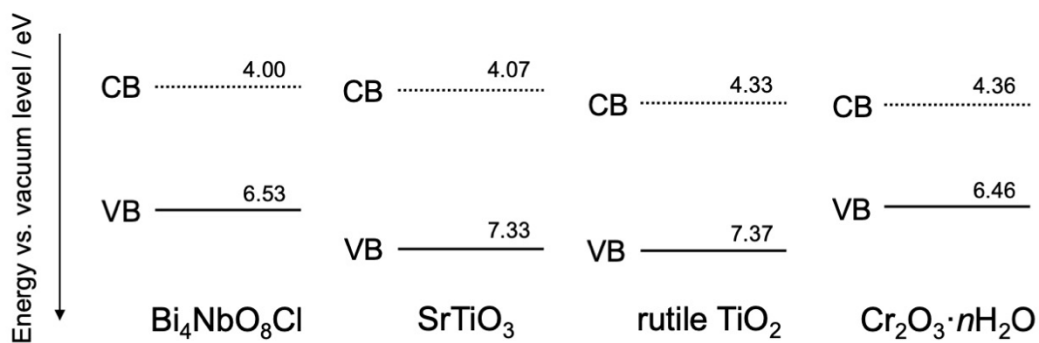

**Figure S25.** Energy level diagram for  $\text{Bi}_4\text{NbO}_8\text{Cl}$ ,  $\text{SrTiO}_3$ ,  $\text{TiO}_2$ , and  $\text{Cr}_2\text{O}_3 \cdot n\text{H}_2\text{O}$ .

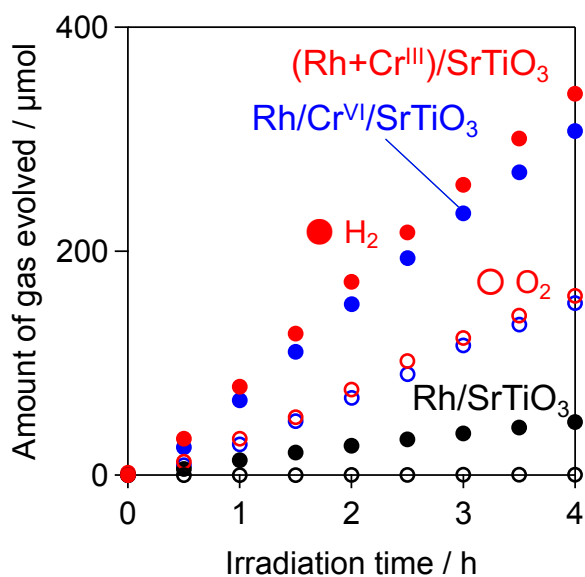

**Figure S26.** Time courses of overall water splitting of Rh and Cr loaded  $\text{SrTiO}_3$ . Every reaction was conducted with 0.1 g of the sample in pure water (250 mL) under UV irradiation ( $\lambda > 300 \text{ nm}$ ).



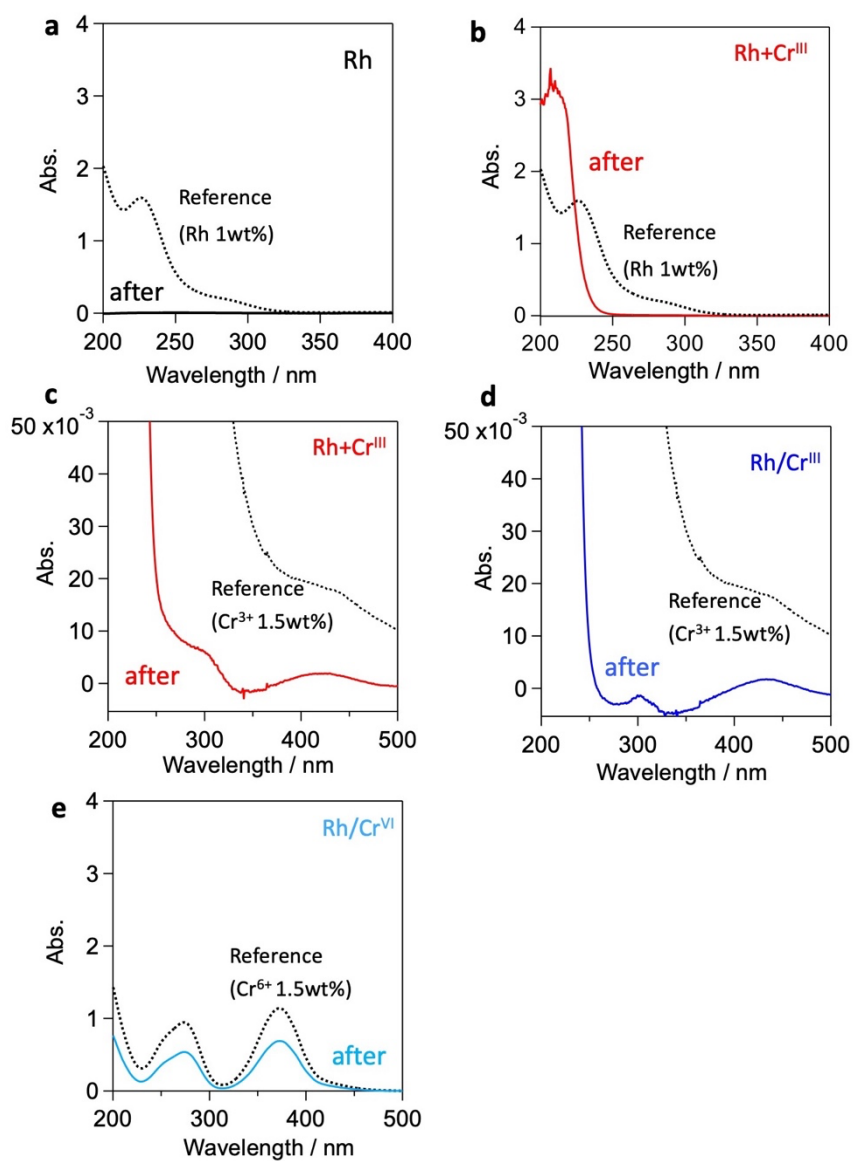

**Figure S27.** Absorption spectra of the solution after the PD process. Rh were fully consumed during the PD process for (a) Rh and (b) Rh+Cr<sup>III</sup>, while the loading amount of Cr were approximately 1.3, 1.3, and 0.6 wt% for (c) Rh+Cr<sup>III</sup>, and (d) Rh/Cr<sup>III</sup>, (e) Rh/Cr<sup>VI</sup> respectively.

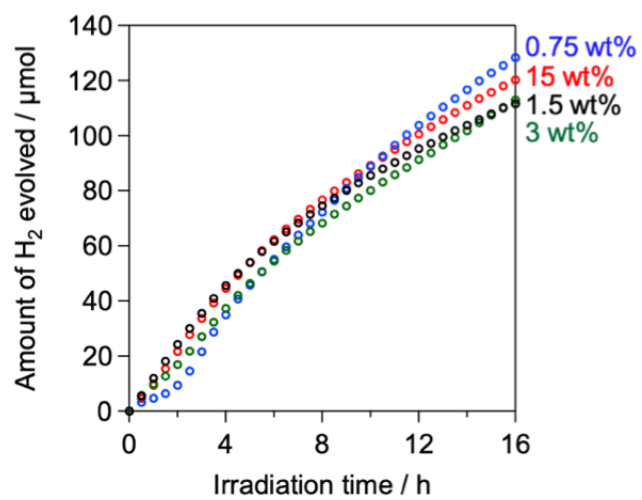

**Figure S28.** Time courses of H<sub>2</sub> evolution of H<sub>2</sub> evolution over Rh+Cr<sup>III</sup> samples prepared with different concentration of Cr<sup>3+</sup> precursor.
